# Supplementary material
Source: PubMed Central journal article supplement (PMC10102420)
Supplement: mmc1.pdf [file mmc1.pdf]

# **Cirrhosis is associated with lower serological responses to COVID-19 vaccines in patients with chronic liver disease**

André Lopes Simão, Carolina Santos Palma, Laura Izquierdo-Sanchez,  
Antonella Putignano, Angela Carvalho-Gomes, Andreas Posch, Paola  
Zanaga, Irina Girleanu, Mariana Moura Henrique, Carlos Araújo, Delphine  
Degre, Thierry Gustot, Iván Sahuco, Elia Spagnolo, Sofia Carvalhana, Miguel  
Moura, Diogo AE Fernandes, Jesus M Banales, Manuel Romero-Gomez,  
Anca Trifan, Francesco Paolo Russo, Rudolf Stauber, Marina Berenguer,  
Christophe Moreno, João Gonçalves, Helena Cortez-Pinto, Rui E Castro

## Table of contents

|                                         |    |
|-----------------------------------------|----|
| Supplementary patients and methods..... | 2  |
| Supplementary figures.....              | 6  |
| Supplementary tables.....               | 9  |
| Supplementary references.....           | 12 |

## **Supplementary patients and methods**

### *Study population*

Recruitment centers included the C.U.B. Hôpital Erasme, Université Libre de Bruxelles, Brussels, Belgium; La Fe University Hospital, University of Valencia, Valencia, Spain; Medical University of Graz, Graz, Austria; Azienda Ospedale-Università Padova, Padova, Italy; “Grigore T. Popa” University of Medicine and Pharmacy, “St. Spiridon” Emergency Hospital, Iasi, Romania; Centro Hospitalar Universitário Lisboa Norte, Lisbon, Portugal; Virgen del Rocío University Hospital, Institute of Biomedicine of Seville, University of Seville, Spain.

Patients were grouped according to disease etiology into viral hepatitis (HBV, HCV, HDV and/or HEV), autoimmune and/or cholestatic liver disease (primary sclerosing cholangitis (PSC), primary biliary cholangitis (PBC) and/or autoimmune hepatitis (AIH)), metabolic related fatty liver disease (MRFLD; including patients with non-alcoholic fatty liver disease (NAFLD) and/or heavy alcohol consumption), hereditary liver disease (Wilson disease, hemochromatosis and polycystic liver disease), and cryptogenic liver disease. Pharmacology was grouped into immunosuppressive treatment (Prednisone, Tacrolimus, Mycophenolate mofetil, Azathioprine, Budesonide and/or other), antiviral therapy (Tenofovir, Entecavir, Interferon, and/or other), and metabolic therapy (ursodeoxycholic acid, obeticholic acid, fibrates, metformin, GLP-1 agonists, insulin, and/or other). Liver disease stage was categorized according to the Child-Pugh class into CLD without cirrhosis, cirrhosis Child-

Pugh class A, cirrhosis Child-Pugh class B, and cirrhosis Child-Pugh class C. Additionally, comorbidities (type II diabetes, obesity, others) were also recorded.

### *Measurement of antibodies*

SARS-CoV-2 spike S1 and RBD proteins were used immobilized onto high binding polystyrene 384 well microplates (Corning), overnight at 4°C, diluted at 1.00 µg/mL in phosphate buffer saline (PBS) at pH 7.4. On the following day, plates were washed once with 100 µL/well of Wash Buffer (PBS pH 7.2, containing 0.05% Tween- 20), to remove unbound proteins. Plates were then blocked, for 2 h at 37°C, with 3% BSA dissolved in PBS containing 0.1% Tween-20, to prevent unspecific binding of proteins to the plate. After washing, diluted serum samples were added in duplicate to plates and incubated under gentle agitation for 1 h at 24°C. Following a washing cycle, goat anti-human IgG Fc horseradish peroxidase (HRP) conjugated (Invitrogen) and/or goat anti-human IgM µ chain HRP conjugated (Abcam) were added at a 1:20 000 dilution and 1:250 000, respectively, and incubated for 1 h at 24°C. After washing, the signal was developed using an ultrasensitive TMB substrate. The reaction was stopped after 10 minutes with 0.5 M sulfuric acid and optical density (OD) values were read at 450 nm using a plate reader (VarioSkan Lux, ThermoFisher Scientific). Antibody levels were quantified through a calibration curve using a serum sample with previously determined antibody count using Fluidity One-W Serum system from Fluidic Analytics. The cut-off point - to establish positivity - was calculated using a mean value of the concentration of a cohort of 45 pre-pandemic negative

controls, plus three times their standard deviation. The threshold was defined as 7 nM and 1.22 nM for the IgG and IgM assays, respectively.

#### *Surrogate neutralization assay*

Biotinylated human ACE2, His, avitag™ (AC2-H82E6) and SARS-CoV-2 Spike (S) protein RBD, mouse IgG2a Fc (SPD-C5259, AcroBiosystems) were reconstituted according to the manufacturer's instructions. All reagents were diluted in AlphaLISA Hiblock buffer 10-fold diluted (1x) (AL004C, PerkinElmer) and the assay was performed according to non-wash two step procedure. First, AlphaLISA® anti-mouse IgG coupled to acceptor beads (AL105C, Perkin Elmer) was diluted at 50 µg/mL (5x final concentration) and mixed along with the reagents diluted at 25 nM and 50 nM respectively (20x final concentration) in 30% of the final reaction volume (v/v). Next, we distributed on each well, a volume of 7.5 µL of this solution into a grey light AlphaPlate™-384 (6005350, Perkin Elmer). Plasma samples previously diluted in 1% BSA in [PBS-t] (1:10 final concentration) were added to well plates in duplicated. Assay plates were sealed and incubated for 1 h at 24°C with agitation at 600 rpm. Second, AlphaScreen® Streptavidin Donor Beads (6760002, Perkin Elmer), was previously diluted at 40 µg/mL (2x final concentration) in 50% of the final reaction volume (v/v) and a volume of 12.5 µL of this solution was distributed on each well. Plates were sealed again and incubated 1 h plus at 24°C with agitation at 600 rpm and protected from light. Finally, plates were read on a Varioskan™ LUX multimode microplate reader (ThermoFisher Scientific) with filter emission settings for 615/620 nm. Percentage of neutralization was calculated as follows:  $[1 - (\text{mean Alpha signal from unknown$

plasma samples/mean Alpha signal from negative plasma samples)\*100]  
(Cao Y et al., Cell 2020).

For determining the optimal cut-off (Unal I, Comput Math Methods Med 2017), sera samples from healthy volunteers, screened for SARS-CoV-2 Nucleocapsid and Spike proteins, were used (n=78). The test gave a probability of 92% (AUROC = 0.92) with a statistical significance of <0,0001. Maximum Sensitivity was 80% and Specificity was 94%, with a cut-off of 24%.

Results obtained by the surrogate neutralizing assay were correlated with those of a pseudovirus neutralizing assay (PVNT) using a panel of 45 serum samples from adults vaccinated with the BNT162b2 vaccine at 5 timepoints - baseline, 1 week after first dose and 2, 8 and 20 weeks after the second dose (r=0.83; p<0.0001).

## Supplementary figures

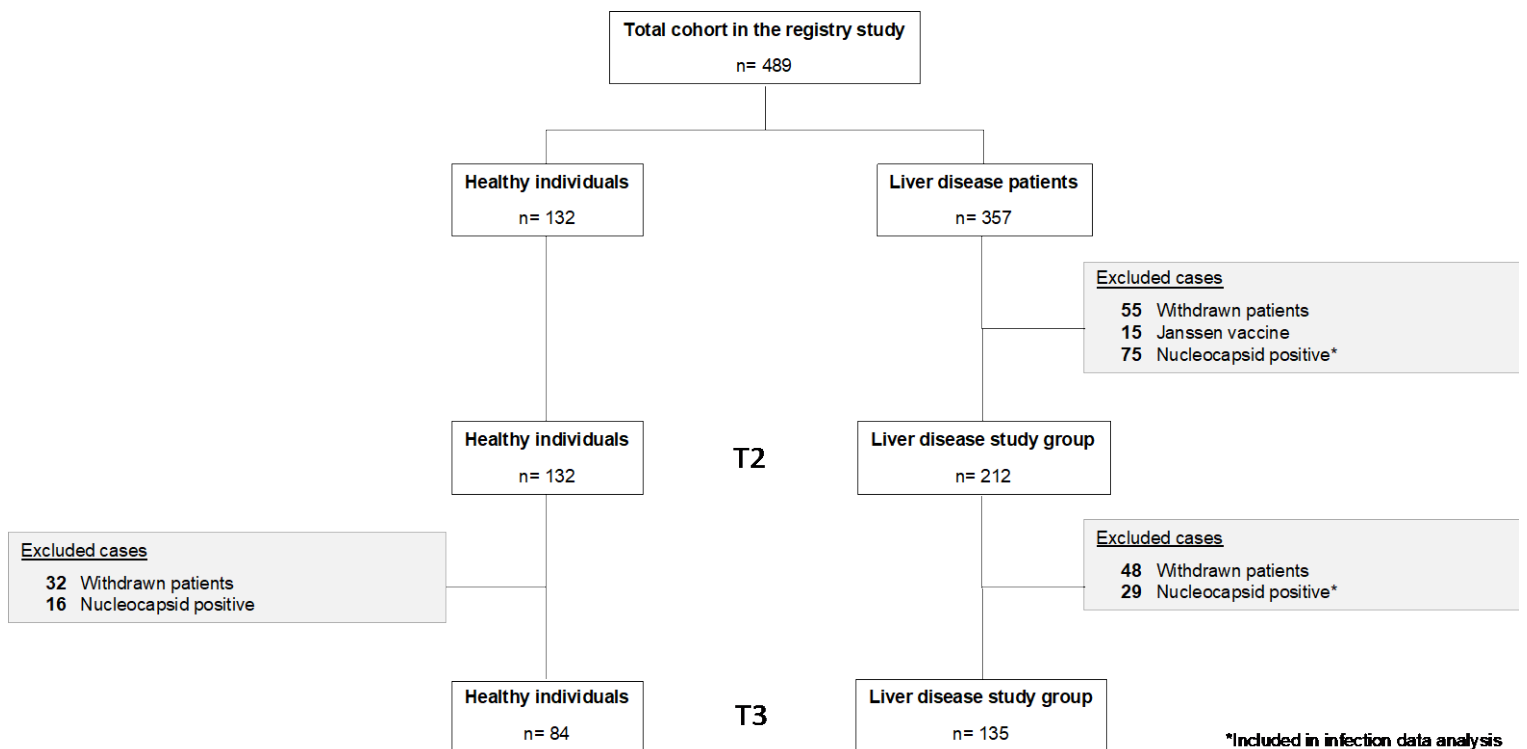

**Fig. S1.** CONSORT flow chart with the exclusion criteria and the study cohorts. T2 - two weeks after two dose-vaccination; T3 - six months after start of vaccination

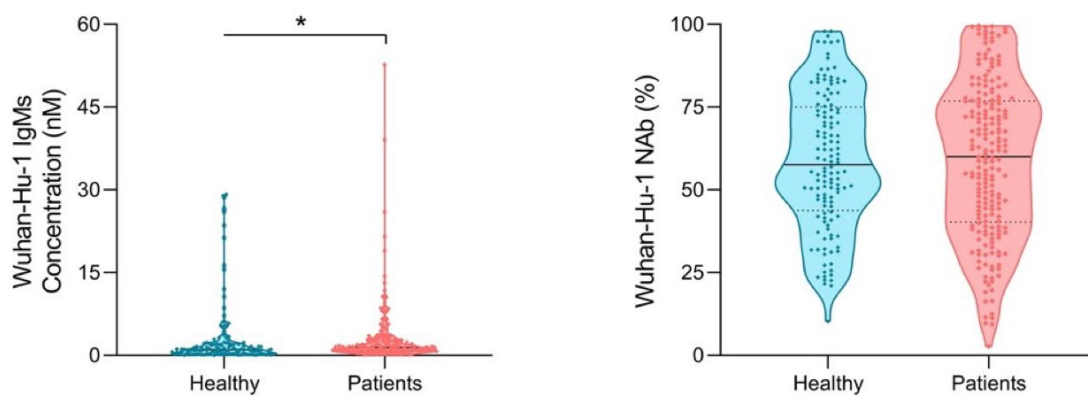

**Fig. S2. IgM and NAb titers two-weeks after the second SARS-CoV-2 vaccine dose (T2) in healthy volunteers and patients with CLD.** Violin plots representing IgG, IgM and NAb levels. Black horizontal lines indicate the median and grey dotted lines indicate the interquartile range. Parametric or non-parametric data was analyzed using the Student's t-test or the Mann Whitney test, respectively. \* $p < 0.05$

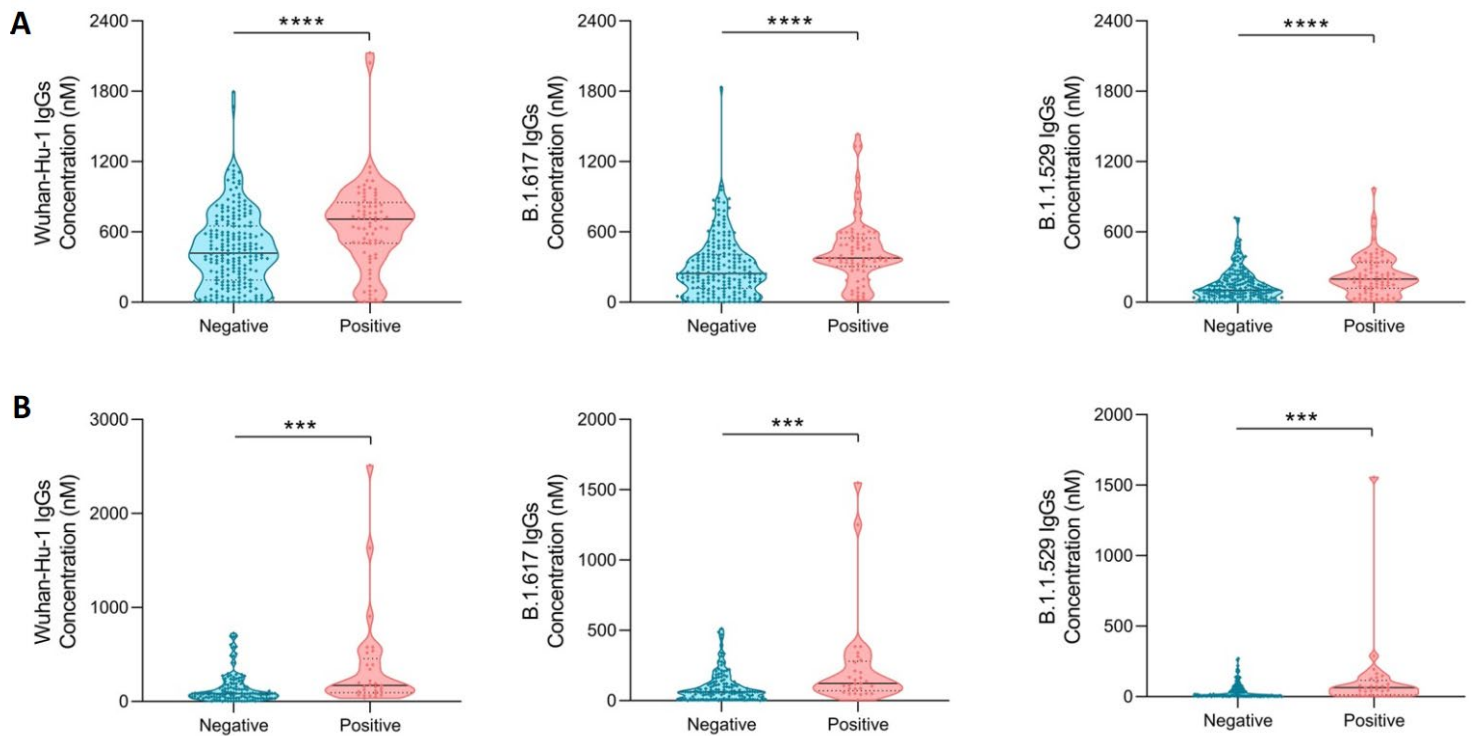

**Fig. S3. Wuhan-Hu-1, B.1.617 (Delta) and B.1.1.529 (Omicron) IgG titers in COVID-19 non-infected versus priorly infected CLD patients.** Violin plots representing IgG levels at (A) two-weeks after the second SARS-CoV-2 vaccine dose (T2) and (B) six months after the start of vaccination (T3). Black horizontal lines indicate the median and grey dotted lines indicate the interquartile range. Parametric or non-parametric data was analyzed using the Student's t-test or the Mann Whitney test, respectively. \*\*\* $p < 0.001$ ; \*\*\*\* $p < 0.0001$ .



## Supplementary tables

**Table S1** Antibody response to COVID-19 vaccination in healthy volunteers and patients with CLD two weeks after the second SARS-CoV-2 vaccine dose (T2)

| Healthy Volunteers                        | ChAdOx1 nCoV-19<br>(n = 12) | mRNA-1273<br>(n = 10)   | BNT162b2<br>(n = 110) | Total (n = 132)       | p value |
|-------------------------------------------|-----------------------------|-------------------------|-----------------------|-----------------------|---------|
| Age                                       | 41.0 (33.0 – 55.3)          | 39.5 (27.8 – 59.5)      | 46.5 (38.0 – 58.0)    | 45.5 (37.0 – 57.3)    | ns      |
| Male                                      | 6 (50.0)                    | 3 (30.0)                | 28 (25.5)             | 37 (28.0)             | ns      |
| <b>Days after second dose vaccination</b> | 15.0 (15.0 – 15.0)          | 28.0 (16.8 – 28.0)      | 17.0 (15.0 – 21.0)    | 16.0 (15.0 – 21.0)    | ns      |
| Negative serologic response (IgG)         | 1 (8.3)                     | 0 (0.0)                 | 3 (2.7)               | 4 (3.0)               | ns      |
| Negative serologic response (NAb)         | 1 (8.3)                     | 0 (0.0)                 | 6 (5.5)               | 7 (5.3)               | ns      |
| <b>Antibody titer (T2)</b>                |                             |                         |                       |                       |         |
| IgG Wuhan-Hu-1 (nM)                       | 276.7 (87.2 – 397.0)        | 768.4 (555.3 – 1,009.2) | 408.9 (250.2 – 541.0) | 409.6 (254.3 – 576.3) | <0.0001 |
| IgM (nM)                                  | 0.4 (0.2 – 1.6)             | 12.0 (4.8 – 22.5)       | 1.0 (0.3 – 2.0)       | 1.0 (0.3 – 2.2)       | <0.0001 |
| % of neutralization                       | 39.8 (33.0 – 49.8)          | 85.3 (76.3 – 94.7)      | 58.4 (46.1 – 74.1)    | 57.6 (43.8 – 75.1)    | <0.0001 |
| Patients with CLD                         | ChAdOx1 nCoV-19<br>(n = 23) | mRNA-1273<br>(n = 40)   | BNT162b2<br>(n = 149) | Total (n = 212)       | p value |
| <b>Antibody titer at baseline (T0)</b>    |                             |                         |                       |                       |         |
| IgG Wuhan-Hu-1 (nM)                       | 0.2 (0.0 – 0.6)             | 0.0 (0.0 – 0.6)         | 0.2 (0.0 – 1.1)       | 0.2 (0.0 – 0.9)       | ns      |
| IgM (nM)                                  | 0.2 (0.1 – 0.5)             | 0.2 (0.1 – 0.3)         | 0.3 (0.1 – 0.5)       | 0.3 (0.1 – 0.5)       | ns      |
| % of neutralization                       | 17.8 (10.4 – 24.5)          | 10.5 (7.3 – 13.2)       | 17.1 (9.4 – 22.5)     | 14.8 (8.4 – 21.1)     | <0.01   |
| <b>Days after second dose vaccination</b> | 19.0 (15.0 – 22.0)          | 17.0 (15.0 – 20.0)      | 15.5 (14.0 – 23.0)    | 17.0 (14.0 – 22.5)    | ns      |
| Negative serologic response (IgG)         | 0 (0.0)                     | 1 (2.5)                 | 7 (4.7)               | 8 (3.8)               | ns      |
| Negative serologic response (NAb)         | 3 (13.0)                    | 5 (12.5)                | 8 (5.4)               | 16 (7.5)              | ns      |
| <b>Antibody titer (T2)</b>                |                             |                         |                       |                       |         |
| IgG Wuhan-Hu-1 (nM)                       | 61.7 (40.7 – 206.1)         | 535.3 (310.8 – 856.1)   | 444.0 (242.7 – 649.8) | 419.0 (188.1 – 650.0) | <0.0001 |
| IgM (nM)                                  | 0.9 (0.6 – 1.7)             | 1.7 (0.9 – 5.1)         | 1.4 (0.8 – 2.8)       | 1.4 (0.8 – 2.8)       | <0.01   |
| % of neutralization                       | 42.6 (36.2 – 53.6)          | 61.9 (35.1 – 85.9)      | 64.2 (44.2 – 77.0)    | 60.0 (40.3 – 76.9)    | <0.05   |

Data are displayed as median (interquartile range) for continuous variables and number (%) for gender. Kruskal-Wallis and Pearson's Chi-square ( $\chi^2$ ) test were used to compare quantitative and qualitative variables, respectively, between the three vaccine developers.  $p < 0.05$  was considered statistically significant.

**Table S2** Antibody response to COVID-19 vaccines in healthy volunteers and patients with CLD two weeks after two-dose vaccination (T2) and 6 months after start of vaccination (T3)

| Antibody titer in healthy volunteers (T2) | ChAdOx1 nCoV-19<br>(n = 12)     | mRNA-1273<br>(n = 10) | BNT162b2<br>(n = 110) | Total<br>(n = 132)                | p value |
|-------------------------------------------|---------------------------------|-----------------------|-----------------------|-----------------------------------|---------|
| IgG B.1.617 (nM)                          | 174.2 (58.6 – 290.0)            | 454.8 (356.0 – 653.7) | 275.5 (149.4 – 413.2) | 275.5 (152.8 – 422.8)             | <0.01   |
| IgG B.1.1.529 (nM)                        | 157.4 (32.3 – 214.2)            | 245.2 (113.9 – 409.1) | 130.1 (86.4 – 220.8)  | 136.5 (89.3 – 224.6)              | <0.05   |
| Antibody titer in patients with CLD (T2)  | ChAdOx1 nCoV-19<br>(n = 23)     | mRNA-1273<br>(n = 40) | BNT162b2<br>(n = 149) | Total<br>(n = 212)                | p value |
| IgG B.1.617 (nM)                          | 47.1 (23.3 – 78.2) <sup>†</sup> | 352.6 (214.1 – 571.6) | 257.4 (143.9 – 410.0) | 245.4 (119.9 – 408.2)             | <0.0001 |
| IgG B.1.1.529 (nM)                        | 24.5 (4.7 – 78.5) <sup>‡</sup>  | 141.4 (79.7 – 295.8)  | 110.8 (56.4 – 188.8)  | 103.6 (47.4 – 192.6) <sup>†</sup> | <0.0001 |
| Antibody titer in healthy volunteers (T3) | ChAdOx1 nCoV-19<br>(n = 8)      | mRNA-1273<br>(n = 2)  | BNT162b2<br>(n = 74)  | Total<br>(n = 84)                 | p value |
| IgG Wuhan-Hu-1 (nM)                       | 82.7 (50.0 – 127.2)             | 293.4 (238.8 - .)     | 80.8 (46.8 – 142.8)   | 85.0 (47.5 – 149.9)               | ns      |
| IgG B.1.617 (nM)                          | 55.0 (43.0 – 90.2)              | 204.4 (156.2 - .)     | 48.9 (34.8 – 86.9)    | 50.9 (35.2 – 92.0)                | ns      |
| IgG B.1.1.529 (nM)                        | 20.5 (13.8 – 37.5)              | 65.2 (62.0 - .)       | 17.6 (10.9 – 28.0)    | 17.8 (11.0 – 32.9)                | ns      |
| Days after start of vaccination           | 201 (198-201)                   | 190 (190-192.5)       | 190 (170-195)         | 192 (173.8-196.3)                 | ns      |
| Antibody titer in patients with CLD (T3)  | ChAdOx1 nCoV-19<br>(n = 18)     | mRNA-1273<br>(n = 25) | BNT162b2<br>(n = 92)  | Total<br>(n = 135)                | p value |
| IgG Wuhan-Hu-1 (nM)                       | 32.8 (8.6 – 85.9)               | 176.1 (81.5 – 257.2)  | 82.0 (40.1 – 147.4)   | 83.1 (39.4 – 183.2)               | <0.0001 |
| IgG B.1.617 (nM)                          | 14.6 (5.4 – 67.9)               | 98.8 (59.3 – 171.2)   | 61.4 (13.7- 113.0)    | 62.3 (14.7 – 120.8)               | <0.01   |
| IgG B.1.1.529 (nM)                        | 4.0 (2.5 – 8.5)                 | 16.2 (8.7 – 57.6)     | 8.6 (4.0 – 55.9)      | 9.4 (3.9 – 54.1)                  | <0.05   |
| Days after start of vaccination           | 190 (182.5-206.5)               | 180 (179-182)         | 187 (181-209)         | 185 (180-208.5)                   | ns      |

Data are displayed as median (interquartile range). Kruskal-Wallis test was used to compare the variables between the three vaccine developers, and Mann-Whitney test to compare between healthy volunteers and CLD patients. <sup>†</sup>p < 0.05 and <sup>‡</sup>p < 0.01 comparing with healthy volunteers from the same time-point.

**Table S3** Demographic and clinical characteristics of CLD patients infected and non-infected with COVID-19 prior to two-dose vaccination (T2)

|                                             | Non-infected patients<br>(n = 212) | SARS-CoV-2 infection<br>(n = 75) | p value |
|---------------------------------------------|------------------------------------|----------------------------------|---------|
| <b>General characteristics</b>              |                                    |                                  |         |
| Age                                         | 57.0<br>(52.0 – 64.0)              | 57.0<br>(50.0 – 64.0)            | ns      |
| Male                                        | 120 (56.6)                         | 44 (58.7)                        | ns      |
| <b>Ethnicity</b>                            |                                    |                                  |         |
| Caucasian                                   | 200 (94.3)                         | 69 (92.0)                        |         |
| Asian                                       | 4 (1.9)                            | 2 (2.7)                          |         |
| African                                     | 3 (1.4)                            | 2 (2.7)                          | ns      |
| Other                                       | 3 (1.4)                            | 2 (2.7)                          |         |
| Not reported                                | 2 (0.9)                            | 0 (0.0)                          |         |
| Weight                                      | 75.0<br>(65.0 – 88.0)              | 78.0<br>(68.5 – 88.0)            | ns      |
| Height                                      | 170.0<br>(164.0 – 176.0)           | 171.0<br>(163.0 – 175.3)         | ns      |
| BMI (kg/m <sup>2</sup> )                    | 26.0<br>(23.1 – 30.3)              | 26.6<br>(23.7 – 30.4)            | ns      |
| <b>Etiology of liver disease</b>            |                                    |                                  |         |
| Viral Hepatitis                             | 98 (45.3)                          | 27 (36.0)                        | ns      |
| Autoimmune and/or cholestatic liver disease | 27 (12.7)                          | 12 (16.0)                        | ns      |
| Metabolic related fatty liver disease       | 97 (45.8)                          | 33 (44.0)                        | ns      |
| Hereditary liver disease                    | 5 (2.4)                            | 3 (4.0)                          | ns      |
| Cryptogenic liver disease                   | 1 (0.5)                            | 1 (1.3)                          | ns      |
| <b>Pharmacotherapy</b>                      |                                    |                                  |         |
| Immunosuppressive treatment                 | 18 (8.5)                           | 6 (8.0)                          |         |
| Antiviral therapy                           | 25 (11.8)                          | 7 (9.3)                          |         |
| Metabolic therapy                           | 70 (33.0)                          | 26 (34.7)                        |         |
| <b>Stage of liver disease</b>               |                                    |                                  |         |
| F3 – F4                                     | 141 (66.5)                         | 50 (66.7)                        | ns      |
| Liver cirrhosis                             | 131 (61.8)                         | 48 (64.0)                        | ns      |
| Hepatocellular Carcinoma                    | 15 (7.1)                           | 1 (1.3)                          | ns      |
| <b>Comorbidities</b>                        |                                    |                                  |         |
| Type 2 diabetes mellitus                    | 54 (25.5)                          | 19 (25.3)                        | ns      |
| Arterial Hypertension                       | 66 (31.1)                          | 29 (38.7)                        | ns      |
| Obesity                                     | 42 (19.8)                          | 16 (21.3)                        | ns      |
| Hypertriglyceridemia                        | 14 (6.6)                           | 4 (5.3)                          | ns      |
| Hypercholesterolemia                        | 34 (16.0)                          | 9 (12.0)                         | ns      |
| Renal Insufficiency                         | 8 (3.8)                            | 4 (5.3)                          | ns      |
| Asthma                                      | 9 (4.2)                            | 2 (2.7)                          | ns      |
| Heart/cardiovascular disease                | 26 (12.3)                          | 10 (13.3)                        | ns      |
| Smoking                                     | 26 (12.3)                          | 12 (16.0)                        | ns      |
| Other                                       | 51 (24.1)                          | 12 (16.0)                        | ns      |
| <b>Vaccine type</b>                         |                                    |                                  |         |
| mRNA-1273                                   | 40 (18.9)                          | 23 (30.7)                        |         |
| ChAdOx1 nCoV-19                             | 23 (10.8)                          | 6 (8.0)                          | ns      |
| BNT162b2                                    | 149 (70.3)                         | 46 (61.3)                        |         |

Data are displayed as median (interquartile range) for continuous and number (%) for categorical variable. Mann-Whitney and Fisher's exact tests were used to compare between groups quantitative and qualitative variables, respectively.  $p < 0.05$  was considered statistically significant.

## **Supplementary references**

Cao Y, Su B, Guo X, Sun W, Deng Y, Bao L, et al. Potent Neutralizing Antibodies against SARS-CoV-2 Identified by High-Throughput Single-Cell Sequencing of Convalescent Patients' B Cells. *Cell* 2020; 182: 73-84.e16.

Unal I. Defining an Optimal Cut-Point Value in ROC Analysis: An Alternative Approach. *Comput Math Methods Med* 2017; 2017: 3762651.
