# Supplementary material
Source: PubMed Central journal article supplement (PMC10102420)
Supplement: mmc2.pdf [file mmc2.pdf]

## Journal of Hepatology

### CTAT methods

Tables for a “Complete, Transparent, Accurate and Timely account” (CTAT) are now mandatory for all revised submissions. The aim is to enhance the reproducibility of methods.

- Only include the parts relevant to your study
- Refer to the CTAT in the main text as ‘Supplementary CTAT Table’
- Do not add subheadings
- Add as many rows as needed to include all information
- Only include one item per row

**If the CTAT form is not relevant to your study, please outline the reasons why:**

|  |
|--|
|  |
|--|

#### 1.1 Antibodies

| Name                                                           | Supplier         | Cat no.       |
|----------------------------------------------------------------|------------------|---------------|
| SARS-COV-2 S Protein RBD Mouse IgG2a Fc Tag                    | AcroBiosystems   | SPD-C5259     |
| SARS-COV-2 S (COVID-19) S1 Protein, His Tag                    | AcroBiosystems   | S1N-C52H4     |
| Biotinylated Human ACE2 His, Avitag                            | AcroBiosystems   | AC2-H82E6     |
| SARS-CoV-2 Spike (L452R, T478K)Delta RBD Protein (His Tag)     | Sino Biologicals | 40592-V08H90  |
| SARS-CoV-2B1.1.529 (Omicron) Spike RBD Protein (His Tag)       | Sino Biologicals | 40592-V08H121 |
| SARS-CoV-2 (2019-nCoV) Nucleocapsid Protein (His tag)          | Sino Biologicals | 40588-V07E    |
| goat anti-human IgG Fc horseradish peroxidase (HRP) conjugated | Invitrogen       | A24476        |
| goat anti-human IgM $\mu$ chain HRP conjugated                 | Abcam            | ab97205       |

#### 1.2 Cell lines

| Name | Citation | Supplier | Cat no. | Passage no. | Authentication test method |
|------|----------|----------|---------|-------------|----------------------------|
|      |          |          |         |             |                            |

#### 1.3 Organisms

| Name | Citation | Supplier | Strain | Sex | Age | Overall n number |
|------|----------|----------|--------|-----|-----|------------------|
|      |          |          |        |     |     |                  |

#### 1.4 Sequence based reagents

| Name | Sequence | Supplier |
|------|----------|----------|
|      |          |          |

#### 1.5 Biological samples

| Description | Source | Identifier |
|-------------|--------|------------|
|             |        |            |

|  |  |  |
|--|--|--|
|  |  |  |
|--|--|--|

## 1.6 Deposited data

| Name of repository | Identifier | Link |
|--------------------|------------|------|
|                    |            |      |

## 1.7 Software

| Software name | Manufacturer | Version |
|---------------|--------------|---------|
|               |              |         |

## 1.8 Other (e.g. drugs, proteins, vectors etc.)

|                                      |                                       |                                                                      |
|--------------------------------------|---------------------------------------|----------------------------------------------------------------------|
| Moderna/NIAID mRNA-1273 mRNA vaccine | BioNTech-Pfizer BNT162b2 mRNA vaccine | AstraZeneca/University of Oxford ChAdOx1 adenoviral vectored vaccine |
|                                      |                                       |                                                                      |

## 1.9 Please provide the details of the corresponding methods author for the manuscript:

Rui Eduardo Castro, Research Institute for Medicines (iMed.Ulisboa), Faculty of Pharmacy, Universidade de Lisboa, Av. Prof. Gama Pinto, 1649-003 Lisbon, Portugal.  
Phone: +351 21 794 6400; Fax: +351 21 794 6491; email: [ruieduardocastro@ff.ulisboa.pt](mailto:ruieduardocastro@ff.ulisboa.pt)

## 2.0 Please confirm for randomised controlled trials all versions of the clinical protocol are included in the submission. These will be published online as supplementary information.

|  |
|--|
|  |
|--|
